# Supplementary material
Source: publisher site journal article supplement (https://www.spandidos-publications.com/6853/downloadSupplementary)
Supplement: Supplementary file 1 [file downloadSupplementary]

Table SI. Univariate and multivariate analysis of potential prognostic factors of the 5-year overall survival rate in patients with right- (n=20) and left-sided (n=20) colon cancer.

| A, RCC                   |    |                     |         |                       |         |
|--------------------------|----|---------------------|---------|-----------------------|---------|
| Factor                   | n  | Univariate analysis |         | Multivariate analysis |         |
|                          |    | 5-year OS, %        | P-value | HR (95% CI)           | P-value |
| Age, years               |    |                     | 0.012   |                       | 0.949   |
| ≤70                      | 8  | 100.00              |         | 1 (Reference)         |         |
| >70                      | 12 | 54.55               |         | 1.041 (0.302-20477)   |         |
| Sex                      |    |                     | 0.161   |                       | -       |
| Male                     | 13 | 68.18               |         | -                     |         |
| Female                   | 7  | 85.71               |         | -                     |         |
| Bowel obstruction        |    |                     | -       |                       | -       |
| Yes                      | 0  | -                   |         | -                     |         |
| No                       | 20 | -                   |         | -                     |         |
| Pre-op CEA, ng/ml        |    |                     | 0.073   |                       | -       |
| ≤5                       | 13 | 78.75               |         | -                     |         |
| >5                       | 7  | 68.57               |         | -                     |         |
| Pre-op CA19-9, U/ml      |    |                     | 0.022   |                       | 0.664   |
| ≤37                      | 17 | 77.92               |         | 1 (Reference)         |         |
| >37                      | 3  | 66.67               |         | 1.669 (0.166-16.809)  |         |
| miR-106b-5p              |    |                     | 0.022   |                       | 0.047   |
| <5.3                     | 10 | 90.00               |         | 0.270 (0.074-0.984)   |         |
| ≥5.3                     | 10 | 52.50               |         | 1 (Reference)         |         |
| T stage                  |    |                     | -       |                       | -       |
| T3                       | 20 | -                   |         | -                     |         |
| T4                       | 0  | -                   |         | -                     |         |
| Differentiation          |    |                     | 0.07    |                       | -       |
| Well to moderate         | 17 | 79.33               |         | -                     |         |
| Poor to undifferentiated | 3  | 50.00               |         | -                     |         |
| Lymphovascular invasion  |    |                     | 0.787   |                       |         |

| Present                 | 2  | 50.00               |         | -                     | -       |
|-------------------------|----|---------------------|---------|-----------------------|---------|
| Absent                  | 18 | 79.33               |         | -                     |         |
| Perineural invasion     |    |                     | -       |                       | -       |
| Present                 | 0  | -                   |         | -                     |         |
| Absent                  | 20 | -                   |         | -                     |         |
| Lymphocyte infiltration |    |                     | 0.771   |                       | -       |
| Present                 | 4  | 66.67               |         | -                     |         |
| Absent                  | 16 | 77.78               |         | -                     | -       |
| Mucinous component, %   |    |                     | -       |                       |         |
| ≥50                     | 0  | -                   |         | -                     |         |
| <50                     | 20 | -                   |         | -                     |         |
| <b>B, LCC</b>           |    |                     |         |                       |         |
| Factor                  | n  | Univariate analysis |         | Multivariate analysis |         |
|                         |    | 5-year OS, %        | P-value | HR (95% CI)           | P-value |
| Age, years              |    |                     | 0.059   |                       | -       |
| ≤70                     | 9  | 88.89               |         | -                     |         |
| >70                     | 11 | 51.43               |         | -                     |         |
| Sex                     |    |                     | 0.461   |                       | -       |
| Male                    | 13 | 62.34               |         | -                     |         |
| Female                  | 7  | 85.71               |         | -                     |         |
| Bowel obstruction       |    |                     | 0.236   |                       | -       |
| Yes                     | 1  | 0.00                |         | -                     |         |
| No                      | 19 | 75.56               |         | -                     |         |
| Pre-op CEA, ng/ml       |    |                     | <0.001  |                       | 0.765   |
| ≤5                      | 15 | 90.91               |         | 1 (Reference)         |         |
| >5                      | 5  | 20.00               |         | 1.379 (0.167-11.361)  |         |
| Pre-op CA19-9, U/ml     |    |                     | 0.569   |                       | -       |
| ≤37                     | 18 | 73.34               |         | -                     |         |
| >37                     | 2  | 50.00               |         | -                     |         |

|                          |    |        |       |  |   |
|--------------------------|----|--------|-------|--|---|
| miR-106b-5p              |    |        | 0.545 |  | - |
| <5.3                     | 8  | 80.00  |       |  | - |
| ≥5.3                     | 12 | 65.63  |       |  | - |
| T stage                  |    |        | 0.082 |  | - |
| T3                       | 17 | 79.33  |       |  | - |
| T4                       | 3  | 33.33  |       |  | - |
| Differentiation          |    |        | -     |  | - |
| Well to moderate         | 20 | -      |       |  | - |
| Poor to undifferentiated | 0  | -      |       |  | - |
| Lymphovascular invasion  |    |        | 0.548 |  | - |
| Present                  | 1  | 100.00 |       |  | - |
| Absent                   | 19 | 68.69  |       |  | - |
| Perineural invasion      |    |        | 0.236 |  | - |
| Present                  | 1  | 0.00   |       |  | - |
| Absent                   | 19 | 75.56  |       |  | - |
| Lymphocyte infiltration  |    |        | 0.356 |  | - |
| Present                  | 4  | 100.00 |       |  | - |
| Absent                   | 16 | 66.30  |       |  | - |
| Mucinous component, %    |    |        | -     |  | - |
| ≥50                      | 0  | -      |       |  | - |
| <50                      | 20 | -      |       |  | - |

RCC, right-sided colon cancer; LCC, left-sided colon cancer; OS, overall survival; CEA, carcinoembryonic antigen; CA19-9, carbohydrate antigen 19-9; miR, microRNA; T stage, tumor stage; HR, hazard ratio; CI, confidence interval.
